# Supplementary material
Source: PubMed Central journal article supplement (PMC9149118)

**Figure 4F**

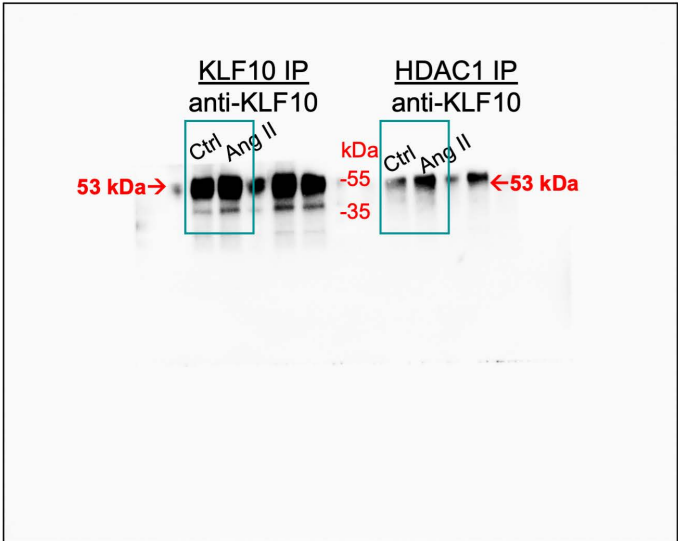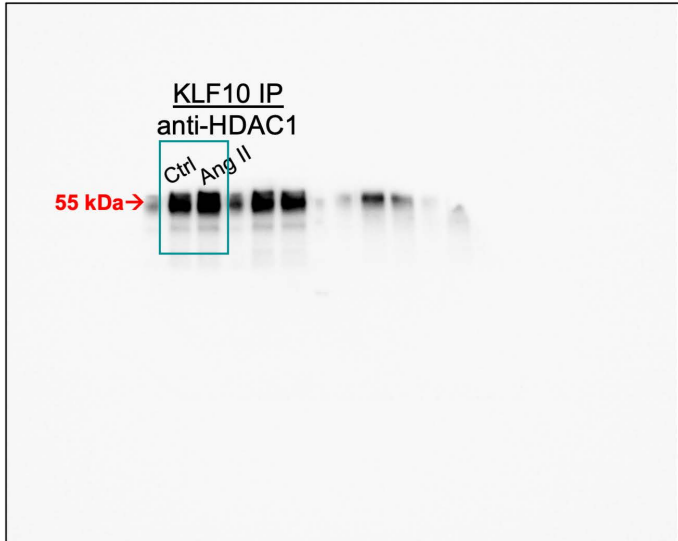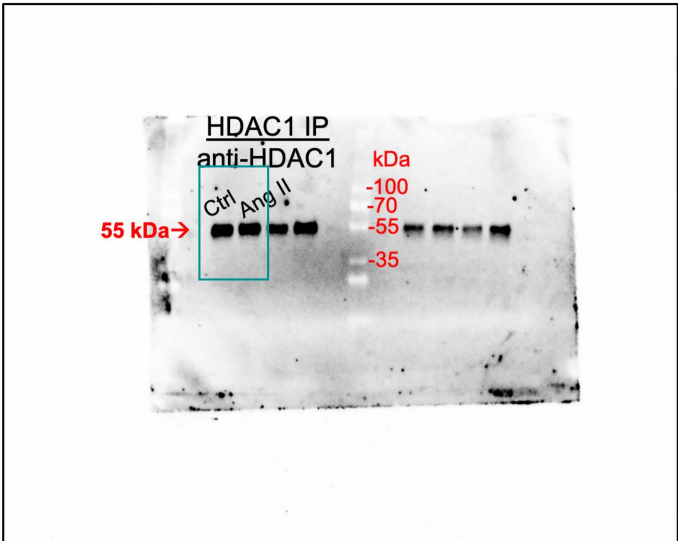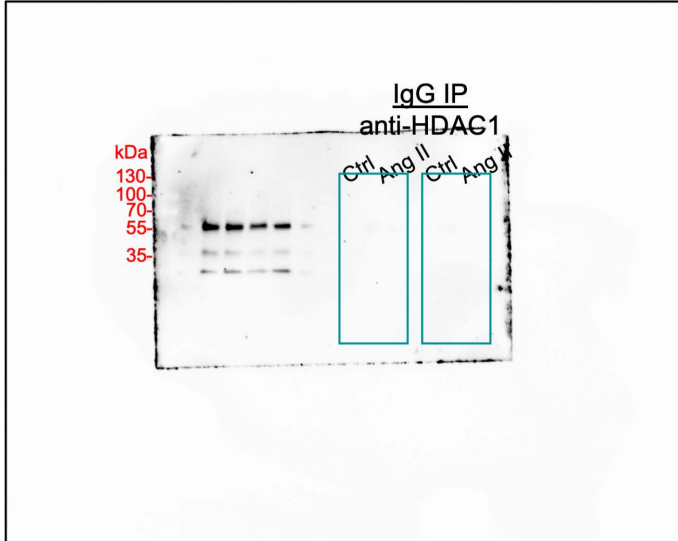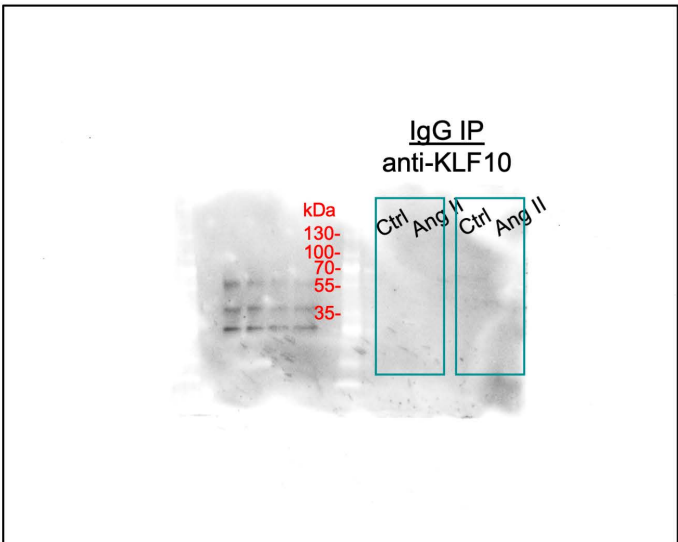

Supplement: NIHMS1798506-supplement-320420_Uncut_Gel_Blots.pdf [file NIHMS1798506-supplement-320420_Uncut_Gel_Blots.pdf]
